# Supplementary material for: A Multicenter Cross-Sectional Survey of Knowledge, Attitude, and Practices of Healthcare Professionals towards Antimicrobial Stewardship in Ghana: Findings and Implications
Source: MDPI journal article supplement (doi:10.3390/antibiotics12101497), 2023-09-29
Supplement: s1 [file s1]

## Supplementary Table - TABLE S1 - QUESTIONNAIRE FOR DATA COLLECTION

### SECTION A: Socio demographics of Healthcare Professionals (HCPs)

1. Age: .....(years)
2. Sex: Male ☐ Female ☐ Other ☐
3. Name of Hospital: .....
4. Level of facility: Primary ☐ Secondary ☐ Tertiary ☐
5. Professional designation?: Medical doctor ☐ Pharmacist ☐ Nurse ☐
6. If you are a medical doctor, what is your specialty?  
 Medicine ☐ Paediatrics ☐ Obs/ Gynae ☐ Surgery ☐ Infectious disease Clinician ☐  
 Pathologist ☐ Others ☐ (Specify.....) Not applicable ☐
7. How long have practiced in your current profession:
8. What is your highest level of education? Diploma/HND ☐ Bachelor degree  
☐ Masters/Membership ☐ PhD /Fellowship ☐ Others ☐ (Specify.....)
9. Have you ever received formal structured trained on antimicrobial stewardship or infectious disease management? Yes ☐ No ☐
10. In the last year, have you received any update training on antimicrobial use or stewardship practices?  
 Yes ☐ No ☐

### SECTION B: Knowledge of HCPs on Antimicrobial Stewardship Interventions

| S/N | STATEMENT                                                                                                                                                                           | Yes | No | Not sure | Correct Answers |
|-----|-------------------------------------------------------------------------------------------------------------------------------------------------------------------------------------|-----|----|----------|-----------------|
| 1   | Antimicrobial prescription audit with feedback is an antimicrobial stewardship program (ASP) intervention that can help persuade prescribers to prescribe antimicrobials rationally |     |    |          | Yes             |
| 2   | Facility Antibigram is useful to guide rational antibiotic use.                                                                                                                     |     |    |          | Yes             |
| 3   | Antimicrobial automatic stop orders is a persuasive ASP intervention?                                                                                                               |     |    |          | No              |
| 4   | Prior authorization of restricted antimicrobials is an ASP strategy that can be used to reduce the rate of AMR development                                                          |     |    |          | Yes             |
| 5   | Are you familiar with the WHO and/or Centers for Disease Control and Prevention (CDC) guideline for ASP?                                                                            |     |    |          | Yes             |
| 6   | Point prevalence survey of antimicrobials is a surveillance method that can be used in the hospital settings?                                                                       |     |    |          | Yes             |
| 7   | Do you now about the five antimicrobial prescribing decision for ensuring optimal antimicrobial use in a hospital setting?                                                          |     |    |          | Yes             |
| 8   | Azithromycin is an antibiotic in the Access group of the WHO AWaRE classification of antibiotics?                                                                                   |     |    |          | No              |

|    |                                                                                                                                                      |  |  |  |    |
|----|------------------------------------------------------------------------------------------------------------------------------------------------------|--|--|--|----|
| 9  | De-escalation is not one of the ASP strategy of optimizing antimicrobial use to prevent AMR?                                                         |  |  |  | No |
| 10 | According to WHO classification of antimicrobials (AWaRE), nothing more 60% of antimicrobial consumption in a country must be from the Access Group. |  |  |  | No |

#### SECTION C: Attitude of HCPs towards ASP assessment

| S/N | STATEMENT                                                                                                        | Strongly Agree | Agree | Neutral (Don't know) | Disagree | Strongly Disagree | Correct answers   |
|-----|------------------------------------------------------------------------------------------------------------------|----------------|-------|----------------------|----------|-------------------|-------------------|
| 1   | Antimicrobial stewardship program (ASP) is a necessity in our hospital to ensure rational use of antimicrobials. |                |       |                      |          |                   | Strongly agree    |
| 2   | ASP can help reduce the health care cost to patients.                                                            |                |       |                      |          |                   | Strongly agree    |
| 3   | ASP can help reduce the adverse effects of inappropriate antimicrobial prescription.                             |                |       |                      |          |                   | Strongly agree    |
| 4   | ASP threatens clinicians' autonomy.                                                                              |                |       |                      |          |                   | Strongly disagree |
| 5   | Antimicrobial restrictions policies will negatively impact on patient care.                                      |                |       |                      |          |                   | Strongly disagree |
| 6   | The antimicrobial treatment guidelines are difficult to implement in ideal healthcare setting.                   |                |       |                      |          |                   | Strongly disagree |
| 7   | I prefer to take my senior's advice rather than following antimicrobial guidelines.                              |                |       |                      |          |                   | Strongly disagree |

#### SECTION D: Practices of HCPs of ASP assessment

| S/N | STATEMENT                                                                                                                                              | Yes | No | Correct Answers |
|-----|--------------------------------------------------------------------------------------------------------------------------------------------------------|-----|----|-----------------|
| 1   | Antimicrobials should routinely be prescribed when infections are suspected.                                                                           |     |    | No              |
| 2   | Rehydration and watchful waiting without empiric antibiotics is sufficient in most cases of watery diarrhea                                            |     |    | Yes             |
| 3   | Antibiotics should not be routinely prescribed for a patient with productive cough as it does not differentiate between bacterial and viral infection. |     |    | Yes             |
| 4   | In an acute bronchitis assessment there is no need for chest X-ray, sputum culture, viral and serological analysis                                     |     |    | No              |
| 5   | Post-operative antimicrobial prophylaxis should be continued for more than 24 hours to effectively decrease the risk of surgical site infection.       |     |    | No              |

|   |                                                                                                                                                                                                 |  |  |     |
|---|-------------------------------------------------------------------------------------------------------------------------------------------------------------------------------------------------|--|--|-----|
| 6 | Re-dosing of surgical antimicrobials should be considered during surgery if blood loss in patient >1.5L                                                                                         |  |  | Yes |
| 7 | I agree with the practice of the continuous use of antibiotic prophylaxis in a surgical patient as long as a wound drain tube is in situ for the purpose of preventing surgical site infection. |  |  | No  |
